# Supplementary material for: Enantiomeric crystallization of (±)-trans-1,2-diaminocyclohexane under pressure
Source: Royal Society of Chemistry journal article supplement (doi:10.1039/c1ce05553d), 2011-01-01
Supplement: c1ce05553d.pdf [file c1ce05553d.pdf]

## Supporting Information

### Enantiomeric crystallization of ( $\pm$ )-*trans*-1,2-diaminocyclohexane under pressure

Weizhao Cai and Andrzej Katrusiak\*

*Faculty of Chemistry, Adam Mickiewicz University, Grunwaldzka 6, 60-780 Poznań, Poland*

\*E-mail: [katran@amu.edu.pl](mailto:katran@amu.edu.pl)

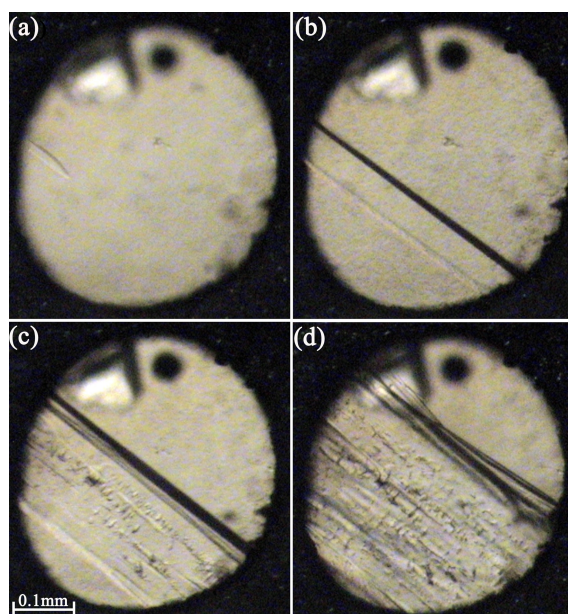

**Fig. S1** Isochoric growth of a single crystal of neat ( $\pm$ )-DACH in the DAC chamber: (a) a crystal seed in the left part of the chamber at 383 K; (b) at 363 K; (c) at 343 K; (d) the single crystal filling *ca.* 60% of the DAC chamber at 0.36 GPa/296 K. A ruby chip for pressure calibration lies at the upper edge of the chamber, close to a small metal ball used for viscosity measurement of ( $\pm$ )-DACH.

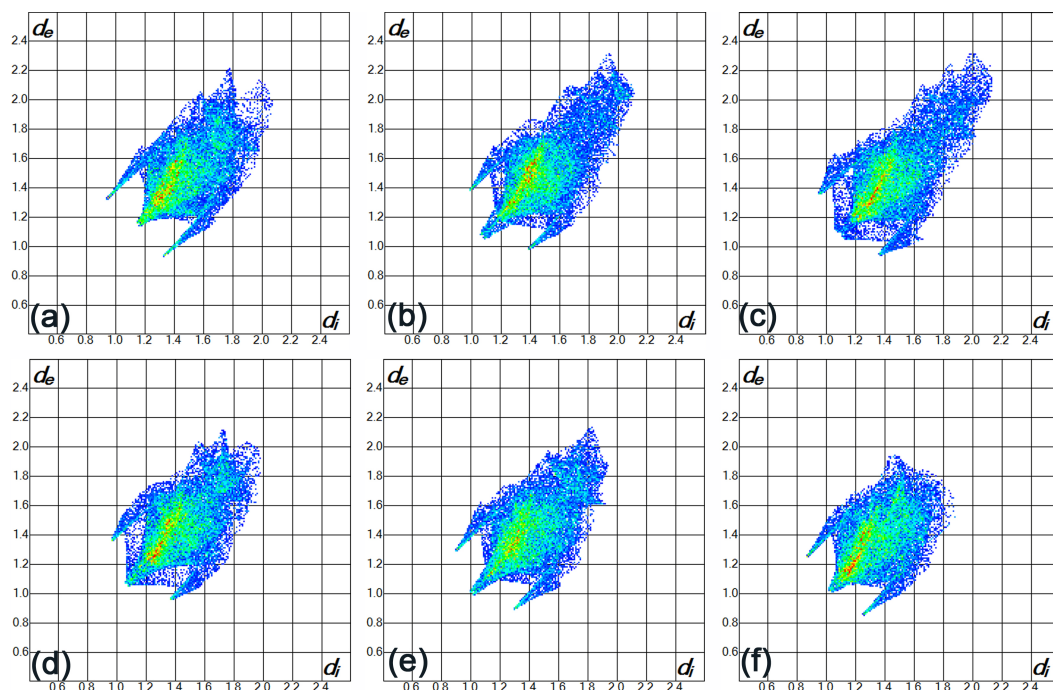

**Fig. S2** 2D fingerprint plots of (+)-DACH structures at (a) 0.1 MPa/ 110 K; (b) 0.36 GPa/296 K; (c) 0.52 GPa/296 K; (d) 0.65 GPa/296 K; (e) 1.19 GPa/296 K; and (f) 2.04 GPa/296 K.

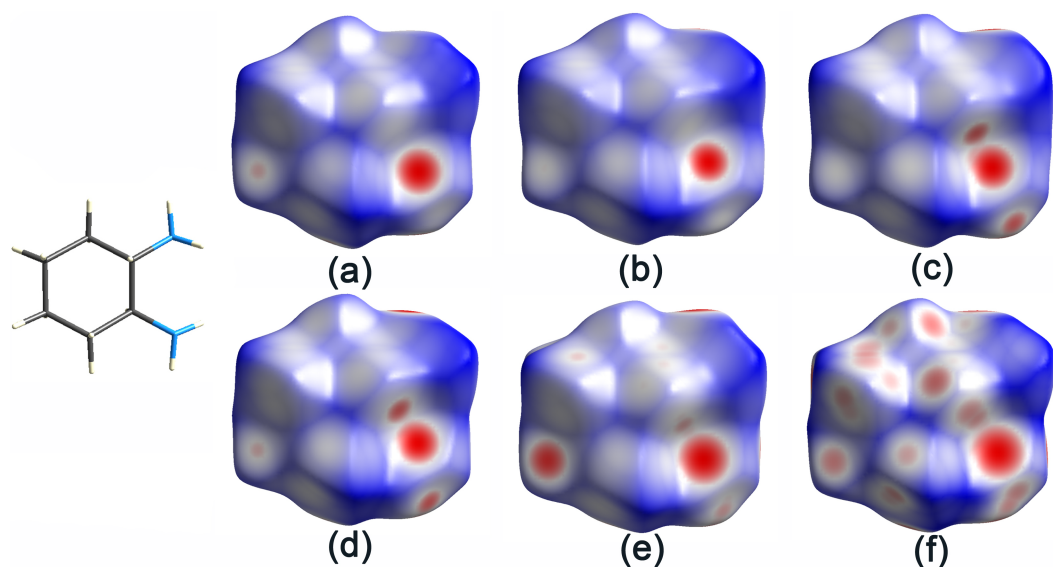

**Fig. S3** Normalized intermolecular contacts mapped on the Hirshfeld surfaces of (+)-DACH structures at (a) 0.1 MPa/110 K; (b) 0.36 GPa/296 K; (c) 0.52 GPa/296 K; (d) 0.65 GPa/296 K; (e) 1.19 GPa/296 K; and (f) 2.04 GPa/296 K. The colour scale describes distances longer (navy-blue), equal (white), and shorter (red) than the van der Waals radii.

**Table S1** Crystal data of (±)-DACH at 0.36, 0.52, 0.65, 1.19 and 2.04 GPa/296 K

| Pressure                                      | 0.36 GPa                                                       | 0.52 GPa                                                       | 0.65 GPa <sup>a</sup>                                            | 1.19 GPa                                                         | 2.04 GPa <sup>a</sup>                                          |
|-----------------------------------------------|----------------------------------------------------------------|----------------------------------------------------------------|------------------------------------------------------------------|------------------------------------------------------------------|----------------------------------------------------------------|
| Temperature                                   | 296 K                                                          | 296 K                                                          | 296 K                                                            | 296 K                                                            | 296 K                                                          |
| Crystal size (mm)                             | 0.40/0.32/0.28                                                 | 0.36/0.28/0.12                                                 | 0.37/0.30/0.14                                                   | 0.32/0.30/0.28                                                   | 0.34/0.20/0.12                                                 |
| Crystal system                                | Orthorhombic                                                   | Orthorhombic                                                   | Orthorhombic                                                     | Orthorhombic                                                     | Orthorhombic                                                   |
| Space group                                   | $P2_12_12$                                                     | $P2_12_12$                                                     | $P2_12_12$                                                       | $P2_12_12$                                                       | $P2_12_12$                                                     |
| $a/\text{Å}$                                  | 8.5210(17)                                                     | 8.40(6)                                                        | 8.345(8)                                                         | 8.200(13)                                                        | 8.08(3)                                                        |
| $b/\text{Å}$                                  | 5.2696(11)                                                     | 5.159(5)                                                       | 5.150(7)                                                         | 5.13(3)                                                          | 4.914(16)                                                      |
| $c/\text{Å}$                                  | 7.7240(15)                                                     | 7.61(3)                                                        | 7.558(10)                                                        | 7.40(2)                                                          | 7.33(2)                                                        |
| $V/\text{Å}^3$                                | 346.83(12)                                                     | 330(3)                                                         | 324.8(7)                                                         | 311(2)                                                           | 291.1(16)                                                      |
| $Z$                                           | 2                                                              | 2                                                              | 2                                                                | 2                                                                | 2                                                              |
| $\rho_{\text{cal}} (\text{g}/\text{cm}^3)$    | 1.093                                                          | 1.150                                                          | 1.168                                                            | 1.218                                                            | 1.303                                                          |
| $\theta$ range ( $^\circ$ )                   | 3.56–27.32                                                     | 4.77–28.80                                                     | 3.64–28.60                                                       | 3.71–28.95                                                       | 2.78–25.43                                                     |
| $\mu$ ( $\text{mm}^{-1}$ )                    | 0.067                                                          | 0.071                                                          | 0.072                                                            | 0.075                                                            | 0.080                                                          |
| $F(000)$                                      | 128                                                            | 128                                                            | 128                                                              | 128                                                              | 128                                                            |
| Limiting indices                              | $-8 \leq h \leq 8$<br>$-6 \leq k \leq 6$<br>$-5 \leq l \leq 5$ | $-6 \leq h \leq 7$<br>$-6 \leq k \leq 6$<br>$-8 \leq l \leq 8$ | $-10 \leq h \leq 10$<br>$-4 \leq k \leq 4$<br>$-8 \leq l \leq 8$ | $-10 \leq h \leq 11$<br>$-4 \leq k \leq 3$<br>$-8 \leq l \leq 8$ | $-5 \leq h \leq 5$<br>$-5 \leq k \leq 5$<br>$-8 \leq l \leq 8$ |
| $R_{\text{int}}$                              | 0.1472                                                         | 0.3243                                                         | 0.2199                                                           | 0.4098                                                           | 0.1491                                                         |
| Data/restraints/parameters                    | 201 / 8 / 40                                                   | 300 / 2 / 30                                                   | 351 / 2 / 35                                                     | 268 / 28 / 35                                                    | 181 / 5 / 20                                                   |
| $R_1/wR_2$ ( $I > 4\sigma$ )                  | 0.0535/0.1201                                                  | 0.1889/0.3133                                                  | 0.0939/0.1492                                                    | 0.1269/0.1922                                                    | 0.1732/0.2397                                                  |
| $R_1/wR_2$ indices (all data)                 | 0.0715/0.1278                                                  | 0.4255/0.4550                                                  | 0.1395/0.1724                                                    | 0.3808/0.2649                                                    | 0.2368/0.2645                                                  |
| Weighting scheme: $x; y^b$                    | 0.0692; 0                                                      | 0.1515; 0.40                                                   | 0.0517; 0.03                                                     | 0.0136; 1.05                                                     | 0.0849; 0.11                                                   |
| Goodness-of-fit on $F_o^2$                    | 1.155                                                          | 1.144                                                          | 1.139                                                            | 1.014                                                            | 1.198                                                          |
| Largest peak/hole ( $e \cdot \text{Å}^{-3}$ ) | 0.10/−0.08                                                     | 0.26/−0.24                                                     | 0.16/−0.16                                                       | 0.20/−0.19                                                       | 0.20/−0.22                                                     |
| CCDC number                                   | 821655                                                         | 821656                                                         | 821657                                                           | 821658                                                           | 821659                                                         |

a. Crystals were obtained with volume ratio (±)-DACH: methanol = 4:1

b.  $w = 1/[\sigma^2(F_o^2) + (xP)^2 + yP]$ , where  $P = (\text{Max}(F_o^2, 0) + 2F_c^2)/3$

**Table S2** Selected bond distances (Å) and angles ( $^\circ$ ) of (±)-DACH at 0.36, 0.52, 0.65, 1.19 and 2.04 GPa/296 K

| Pressure                       | 0.1 MPa <sup>[1]</sup> | 0.36 GPa  | 0.52 GPa  | 0.65 GPa  | 1.19 GPa  | 2.04 GPa  |
|--------------------------------|------------------------|-----------|-----------|-----------|-----------|-----------|
| Temperature                    | 110 K                  | 296 K     | 296 K     | 296 K     | 296 K     | 296 K     |
| N1–C1                          | 1.474(3)               | 1.490(16) | 1.40(3)   | 1.445(7)  | 1.48(3)   | 1.52(3)   |
| C1–C2                          | 1.524(3)               | 1.446(19) | 1.51(2)   | 1.515(7)  | 1.49(2)   | 1.475(19) |
| C1–C1 <sup>i</sup>             | 1.534(4)               | 1.558(14) | 1.59(5)   | 1.496(10) | 1.66(4)   | 1.45(3)   |
| C2–C3                          | 1.524(3)               | 1.600(18) | 1.48(2)   | 1.514(7)  | 1.43(2)   | 1.545(16) |
| C3–C3 <sup>i</sup>             | 1.533(5)               | 1.551(12) | 1.54(5)   | 1.494(11) | 1.44(4)   | 1.56(2)   |
| $\angle$ N1–C1–C2              | 109.8(2)               | 112.9(14) | 115(2)    | 111.1(3)  | 109.4(10) | 107.1(17) |
| $\angle$ C2–C1–C1 <sup>i</sup> | 109.8(1)               | 109.5(4)  | 107.0(14) | 110.6(3)  | 108.8(11) | 111.1(11) |
| $\angle$ N1–C1–C1 <sup>i</sup> | 109.9(2)               | 109.5(5)  | 112.5(15) | 112.4(3)  | 114.6(15) | 113.6(11) |
| $\angle$ C1–C2–C3              | 111.3(2)               | 114.4(13) | 117(3)    | 112.0(3)  | 110.0(12) | 111.7(16) |
| $\angle$ C2–C3–C3 <sup>i</sup> | 111.0(2)               | 108.2(5)  | 107.8(14) | 110.8(4)  | 116.5(13) | 109.2(8)  |

Symmetry code: (i)  $-x+1, -y, z$

**Table S3** Intermolecular distances (Å), angles ( $^\circ$ ) and torsion angles ( $^\circ$ ) of (±)-DACH in low temperature and high pressure structures

| Pressure                            | 0.1 MPa <sup>[1]</sup> | 0.1 MPa <sup>[2]</sup> | 0.36 GPa  | 0.52 GPa   | 0.65 GPa  | 1.19 GPa   | 2.04 GPa   |
|-------------------------------------|------------------------|------------------------|-----------|------------|-----------|------------|------------|
| Temperature                         | 110 K                  | 220 K                  | 296 K     | 296 K      | 296 K     | 296 K      | 296 K      |
| N1–H1                               | 0.91                   | 0.92                   | 0.86      | 0.846      | 0.86      | 0.86       | 0.90       |
| N1–H2                               | 0.88                   | 0.95                   | 0.86      | 0.840      | 0.86      | 0.86       | 0.90       |
| N1–H2...N1 <sup>i</sup>             | 2.39                   | 2.40(2)                | 2.523     | 2.476      | 2.464     | 2.351      | 2.224      |
| N1...N1 <sup>i</sup>                | 3.257(3)               | 3.284(2)               | 3.355(11) | 3.282(29)  | 3.255(5)  | 3.210(18)  | 3.091(26)  |
| N1–H2...C1 <sup>ii</sup>            | 3.141                  | 3.133                  | 3.170     | 3.008      | 2.992     | 2.964      | 2.902      |
| C1–H3...N1 <sup>iii</sup>           | 2.907                  | 2.955                  | 3.038     | 2.942      | 2.891     | 2.797      | 2.643      |
| $\angle$ N1–H2...N1 <sup>i</sup>    | 165.43                 | 162.49                 | 163.10    | 161.25     | 153.20    | 176.32     | 161.53     |
| $\angle$ N1–C1–C2–C3                | −178.9(2)              | −178.9(2)              | −178.6(6) | −175.8(18) | −178.2(4) | −177.5(17) | −176.1(12) |
| $\angle$ C1 <sup>iv</sup> –C1–C2–C3 | 57.8(1)                | –                      | 59.1(11)  | 58(3)      | 56.1(5)   | 61.1(16)   | 59.3(25)   |
| $\angle$ C1–C2–C3–C3 <sup>iv</sup>  | −55.5(1)               | –                      | −56.8(10) | −60(3)     | −55.9(6)  | −52(3)     | −54.9(20)  |

Symmetry codes: (i)  $1.5-x, 0.5+y, 2-z$ ; (ii)  $0.5+x, 0.5-y, 2-z$ ; (iii)  $x-0.5, 0.5-y, 2-z$ ; and (iv)  $-x+1, -y, z$

[1] R. G. Kostyanovsky, F. A. Lakhvich, P. M. Philipchenko, D. A. Lenev, V. Y. Torbeev and K. A. Lyssenko, *Mendeleev Commun.*, 2002, **12**, 147–148.

[2] S. Hanessian, A. Gomsyan, M. Simard and S. Roelens, *J. Am. Chem. Soc.*, 1994, **116**, 4495–4496.
